# Supplementary material for: Analysis of sex-specific risk factors and clinical outcomes in COVID-19
Source: PubMed Central journal article supplement (PMC9053255; doi:10.1038/s43856-021-00006-2), 2021-06-30

## **Analysis of sex-specific risk factors and their association with clinical outcomes in COVID-19**

Tomi Jun<sup>1</sup>, Sharon Nirenberg<sup>2</sup>, Tziopora Weinberger<sup>3</sup>, Navya Sharma<sup>4</sup>, Elisabet Pujadas<sup>5</sup>, Carlos Cordon-Cardo<sup>5</sup>, Patricia Kovatch<sup>2</sup>, Kuan-lin Huang<sup>3\*</sup>

1. Division of Hematology and Medical Oncology, Tisch Cancer Institute, Icahn School of Medicine at Mount Sinai, New York, NY 10029, USA.
2. Scientific Computing, Icahn School of Medicine at Mount Sinai, New York, NY 10029, USA.
3. Department of Genetics and Genomic Sciences, Center for Transformative Disease Modeling, Tisch Cancer Institute, Icahn Institute for Data Science and Genomic Technology, Icahn School of Medicine at Mount Sinai, New York, NY 10029, USA
4. University of California, Santa Barbara, CA, USA.
5. Department of Pathology, Molecular and Cell-Based Medicine, Icahn School of Medicine at Mount Sinai, New York, NY 10029, USA.

## **Supplemental materials**

Supplemental Table 1: Laboratory values at presentation, by sex.

Supplemental Table 2: Treatments received, stratified by ICU status and sex.

Supplemental Table 3: Steroids received, by sex.

Supplemental Table 4: Multivariable logistic regression for in-hospital mortality, ICU-level care, and intubation with oxygen saturation modeled as a continuous variable.

Supplemental Table 5: Subgroup analyses for outcomes of death, intubation, and intensive care. Odds ratios are for male sex relative to female sex.

Supplemental Table 6: Sex-stratified multivariable logistic regression models for death, intubation, and ICU admission.

Supplemental Table 7: Clinical characteristics and outcomes of validation cohort (January 2021) compared to primary cohort (August 2020).

Supplemental Table 8: Multivariable logistic regression for in-hospital mortality, ICU-level care, and intubation using the January 2021 validation cohort.

Supplemental Table 9: Sex-stratified multivariable logistic regression models for death, intubation, and ICU admission using the January 2021 validation cohort.

Supplemental Figure 1: Box plots depicting SARS-CoV-2 viral loads by sex in the Pujadas et al. cohort. The median is represented by the dark line while the lower and upper bounds of the box represent the 25<sup>th</sup> and 75<sup>th</sup> percentiles, respectively. The whiskers reflect the maximum and minimum values of the data.

Supplemental Figure 2: Table and forest plot of multivariable logistic regression models predicting mortality, intubation, or ICU care. Odds ratios are adjusted for all variables listed.

Supplemental Figure 3: Subgroup analysis for male sex as a predictor of mortality in the January 2021 validation cohort. Each subgroup is analyzed using an interaction model between sex and the subgroup variable, adjusting for the other variables listed. The odds ratio for male sex within each strata is presented in the table and forest plot. The interaction p-value for sex and each subgroup variable is shown in the table.

Supplemental Table 1: Laboratory values at presentation, by sex.

| Variable                               | Male<br>(N=2757)            | Female<br>(N=2173)       | P-value | Missing<br>values (%) |
|----------------------------------------|-----------------------------|--------------------------|---------|-----------------------|
| White blood cells, 10 <sup>3</sup> /uL | 7.9 (5.7 - 10.9)            | 7.6 (5.5 - 10.6)         | 0.1     | 0                     |
| Hemoglobin, g/dL                       | 13.6 (11.9 - 14.8)          | 12.4 (11 - 13.5)         | <0.001  | 0                     |
| Platelets, 10 <sup>3</sup> /uL         | 204 (156 - 275)             | 215 (166 - 279.75)       | <0.001  | 0.01                  |
| Neutrophils, 10 <sup>3</sup> /uL       | 6.14 (4.1 - 8.98)           | 5.79 (3.95 - 8.53)       | 0.005   | 0.02                  |
| Lymphocytes, 10 <sup>3</sup> /uL       | 0.87 (0.6 - 1.23)           | 1.05 (0.7 - 1.51)        | <0.001  | 0.02                  |
| Monocytes, 10 <sup>3</sup> /uL         | 0.5 (0.34 - 0.73)           | 0.48 (0.31 - 0.69)       | <0.001  | 0.02                  |
| Basophils, 10 <sup>3</sup> /uL         | 0.01 (0 - 0.03)             | 0.02 (0.01 - 0.03)       | <0.001  | 0.03                  |
| Eosinophils, 10 <sup>3</sup> /uL       | 0.01 (0.01 - 0.04)          | 0.02 (0.01 - 0.05)       | 0.005   | 0.03                  |
| Sodium, mmol/L                         | 137 (133 - 140)             | 138 (135 - 141)          | <0.001  | 0.14                  |
| Potassium, mmol/L                      | 4.3 (3.9 - 4.7)             | 4.1 (3.7 - 4.6)          | <0.001  | 0.05                  |
| Chloride, mmol/L                       | 102 (98 - 106)              | 103 (100 - 107)          | <0.001  | 0.02                  |
| Blood urea nitrogen, mg/dL             | 20 (13 - 37)                | 17 (11 - 33.25)          | <0.001  | 0.02                  |
| Creatinine, mg/dL                      | 1.11 (0.87 - 1.75)          | 0.9 (0.68 - 1.5)         | <0.001  | 0.02                  |
| Aspartate aminotransferase, U/L        | 46 (30 - 74)                | 36 (25 - 57)             | <0.001  | 0.13                  |
| Alanine aminotransferase, U/L          | 34 (20 - 58)                | 24 (16 - 39)             | <0.001  | 0.08                  |
| Total bilirubin, mg/dL                 | 0.6 (0.5 - 0.9)             | 0.5 (0.4 - 0.7)          | <0.001  | 0.08                  |
| Albumin, g/dL                          | 3.2 (2.8 - 3.5)             | 3.1 (2.8 - 3.5)          | 0.1     | 0.07                  |
| Ferritin, ng/mL                        | 938.5 (456.25 -<br>2127.75) | 459 (209 - 963)          | <0.001  | 0.25                  |
| Ferritin, xUpper limit of normal       | 2.35 (1.14 - 5.32)          | 3.06 (1.39 - 6.42)       | <0.001  | 0.25                  |
| Procalcitonin, ng/mL                   | 0.22 (0.1 - 0.69)           | 0.15 (0.06 - 0.55)       | <0.001  | 0.28                  |
| Lactate dehydrogenase, U/L             | 438 (324.5 - 597)           | 388 (293 - 532)          | <0.001  | 0.31                  |
| C-reactive protein, mg/L               | 125.3 (63.61 -<br>211.2)    | 88.4 (36.35 -<br>175.5)  | <0.001  | 0.24                  |
| Troponin-I, ng/mL                      | 0.03 (0.02 - 0.11)          | 0.04 (0.02 - 0.11)       | 0.4     | 0.38                  |
| Interleukin-1-beta, pg/mL              | 0.6 (0.4 - 1)               | 0.6 (0.4 - 0.8)          | 0.4     | 0.86                  |
| Interleukin-6, pg/mL                   | 78.65 (37.52 -<br>144.15)   | 57.85 (30.8 -<br>121.25) | <0.001  | 0.67                  |
| Interleukin-8, pg/mL                   | 41.3 (26.4 - 67.65)         | 41.1 (26.47 - 64.6)      | 0.8     | 0.81                  |
| Tumor necrosis factor-alpha,<br>pg/mL  | 22.1 (16.5 - 31.9)          | 21.9 (15.6 - 32.7)       | 0.6     | 0.81                  |

Values presented as medians and interquartile ranges; P-values from the Wilcoxon rank-sum test.

Supplemental Table 2: Treatments received, stratified by ICU status and sex.

| Cohort  | Treatment           | Male         | Female       | P      | Total |
|---------|---------------------|--------------|--------------|--------|-------|
| Overall | TOCILIZUMAB         | 141 (5.1%)   | 94 (4.3%)    | 0.202  | 235   |
| Overall | REMDESIVIR          | 86 (3.1%)    | 53 (2.4%)    | 0.166  | 139   |
| Overall | SARILUMAB           | 26 (0.9%)    | 5 (0.2%)     | 0.002  | 31    |
| Overall | HYDROXYCHLOROQUINE  | 1862 (67.5%) | 1294 (59.5%) | <0.001 | 3156  |
| Overall | ANAKINRA            | 3 (0.1%)     | 1 (0%)       | 0.635  | 4     |
| Overall | AZITHROMYCIN        | 1805 (65.5%) | 1265 (58.2%) | <0.001 | 3070  |
| Overall | CONVALESCENT_PLASMA | 179 (6.5%)   | 136 (6.3%)   | 0.769  | 315   |
| Overall | STEROID             | 801 (29.1%)  | 542 (24.9%)  | 0.001  | 1343  |
| Overall | DEXAMETHASONE       | 92 (3.3%)    | 72 (3.3%)    | 1      | 164   |
| ICU     | TOCILIZUMAB         | 108 (14.7%)  | 70 (15.9%)   | 0.61   | 178   |
| ICU     | REMDESIVIR          | 34 (4.6%)    | 20 (4.5%)    | 1      | 54    |
| ICU     | SARILUMAB           | 24 (3.3%)    | 4 (0.9%)     | 0.01   | 28    |
| ICU     | HYDROXYCHLOROQUINE  | 530 (72.1%)  | 297 (67.3%)  | 0.09   | 827   |
| ICU     | ANAKINRA            | 3 (0.4%)     | 1 (0.2%)     | 1      | 4     |
| ICU     | AZITHROMYCIN        | 524 (71.3%)  | 310 (70.3%)  | 0.74   | 834   |
| ICU     | CONVALESCENT_PLASMA | 67 (9.1%)    | 54 (12.2%)   | 0.09   | 121   |
| ICU     | STEROID             | 404 (55%)    | 255 (57.8%)  | 0.36   | 659   |
| ICU     | DEXAMETHASONE       | 44 (6%)      | 33 (7.5%)    | 0.33   | 77    |
| NON-ICU | TOCILIZUMAB         | 33 (1.6%)    | 24 (1.4%)    | 0.59   | 57    |
| NON-ICU | REMDESIVIR          | 52 (2.6%)    | 33 (1.9%)    | 0.19   | 85    |
| NON-ICU | SARILUMAB           | 2 (0.1%)     | 1 (0.1%)     | 1      | 3     |
| NON-ICU | HYDROXYCHLOROQUINE  | 1332 (65.9%) | 997 (57.6%)  | <0.001 | 2329  |
| NON-ICU | AZITHROMYCIN        | 1281 (63.4%) | 955 (55.1%)  | <0.001 | 2236  |
| NON-ICU | CONVALESCENT_PLASMA | 112 (5.5%)   | 82 (4.7%)    | 0.3    | 194   |
| NON-ICU | STEROID             | 397 (19.6%)  | 287 (16.6%)  | 0.02   | 684   |
| NON-ICU | DEXAMETHASONE       | 48 (2.4%)    | 39 (2.3%)    | 0.83   | 87    |

*Supplemental Table 3: Steroids received, by sex.*

| Steroid            | Male        | Female      | P     | Total |
|--------------------|-------------|-------------|-------|-------|
| ANY                | 801 (29.1%) | 542 (24.9%) | 0.001 | 1343  |
| PREDNISON          | 222 (8.1%)  | 164 (7.5%)  | 0.522 | 386   |
| DEXAMETHASONE      | 92 (3.3%)   | 72 (3.3%)   | 1     | 164   |
| HYDROCORTISONE     | 12 (0.4%)   | 3 (0.1%)    | 0.07  | 15    |
| METHYLPREDNISOLONE | 639 (23.2%) | 428 (19.7%) | 0.003 | 1067  |

Supplemental Table 4: Multivariable logistic regression for in-hospital mortality, ICU-level care, and intubation with oxygen saturation modeled as a continuous variable.

| Variable                | Death<br>Adj. OR (95% CI) | P-value | Intubation<br>Adj. OR (95% CI) | P-value | ICU<br>Adj. OR (95% CI) | P-value |
|-------------------------|---------------------------|---------|--------------------------------|---------|-------------------------|---------|
| Age <55                 | 0.368 (0.277-0.487)       | <0.001  | 0.611 (0.473-0.791)            | <0.001  | 0.763 (0.619-0.94)      | 0.011   |
| Age 55-64               | Ref                       | -       | Ref                            | -       | Ref                     | -       |
| Age 65-74               | 1.473 (1.18-1.84)         | <0.001  | 1.143 (0.903-1.45)             | 0.27    | 1.087 (0.887-1.33)      | 0.421   |
| Age ≥75                 | 3.32 (2.69-4.12)          | <0.001  | 0.734 (0.573-0.94)             | 0.01    | 0.689 (0.558-0.849)     | <0.001  |
| Male                    | 1.226 (1.05-1.43)         | 0.009   | 1.214 (1.02-1.45)              | 0.03    | 1.359 (1.17-1.57)       | <0.001  |
| Non-Hispanic White      | Ref                       | -       | Ref                            | -       | Ref                     | -       |
| Non-Hispanic Black      | 1.025 (0.835-1.26)        | 0.813   | 1.015 (0.794-1.3)              | 0.91    | 1.044 (0.852-1.28)      | 0.676   |
| Hispanic                | 0.928 (0.754-1.14)        | 0.483   | 1.13 (0.89-1.43)               | 0.32    | 1.132 (0.929-1.38)      | 0.217   |
| Asian                   | 1.021 (0.705-1.48)        | 0.911   | 1.154 (0.759-1.75)             | 0.5     | 1.071 (0.75-1.53)       | 0.705   |
| Other race/ethnicity    | 1.185 (0.933-1.51)        | 0.164   | 1.255 (0.953-1.65)             | 0.11    | 1.252 (0.994-1.58)      | 0.056   |
| Manhattan facility      | 0.645 (0.554-0.75)        | <0.001  | 0.818 (0.686-0.974)            | 0.02    | 0.998 (0.859-1.16)      | 0.978   |
| Before April 13         | Ref                       | -       | Ref                            | -       | Ref                     | -       |
| April 13 - June 2       | 0.552 (0.466-0.652)       | <0.001  | 0.712 (0.586-0.866)            | <0.001  | 0.737 (0.628-0.866)     | <0.001  |
| June 2 - August 5       | 0.165 (0.0803-0.338)      | <0.001  | 0.638 (0.378-1.08)             | 0.09    | 1.502 (1.08-2.09)       | 0.015   |
| Obesity                 | 1.387 (1.18-1.63)         | <0.001  | 1.525 (1.27-1.82)              | <0.001  | 1.539 (1.32-1.79)       | <0.001  |
| Hypertension            | 0.817 (0.684-0.976)       | 0.026   | 0.876 (0.713-1.08)             | 0.21    | 0.862 (0.725-1.02)      | 0.092   |
| Diabetes                | 1.178 (0.98-1.42)         | 0.081   | 1.28 (1.04-1.58)               | 0.02    | 1.289 (1.08-1.54)       | 0.005   |
| Coronary artery disease | 1.192 (0.958-1.48)        | 0.115   | 0.879 (0.666-1.16)             | 0.36    | 1.145 (0.917-1.43)      | 0.232   |
| Heart failure           | 0.989 (0.744-1.32)        | 0.942   | 0.989 (0.693-1.41)             | 0.95    | 1.175 (0.888-1.55)      | 0.259   |
| Atrial fibrillation     | 1.208 (0.923-1.58)        | 0.169   | 1.419 (1.02-1.97)              | 0.04    | 1.468 (1.12-1.93)       | 0.006   |
| Chronic kidney disease  | 1.349 (1.07-1.7)          | 0.012   | 0.87 (0.651-1.16)              | 0.35    | 0.937 (0.741-1.18)      | 0.584   |
| COPD/asthma             | 0.911 (0.705-1.18)        | 0.478   | 0.897 (0.657-1.22)             | 0.49    | 0.91 (0.706-1.17)       | 0.467   |
| Cancer                  | 1.082 (0.823-1.42)        | 0.573   | 0.882 (0.629-1.24)             | 0.47    | 0.976 (0.744-1.28)      | 0.86    |
| Chronic liver disease   | 1.251 (0.818-1.91)        | 0.302   | 1.231 (0.789-1.92)             | 0.36    | 1.074 (0.737-1.57)      | 0.71    |
| Oxygen saturation       | 0.934 (0.924-0.944)       | <0.001  | 0.937 (0.927-0.947)            | <0.001  | 0.94 (0.93-0.949)       | <0.001  |

Supplemental Table 5: Subgroup analyses for outcomes of death, intubation, and intensive care. Odds ratios are for male sex relative to female sex.

| Variable                | N    | Death<br>Interact.<br>P-Value | Death<br>M vs. F OR<br>(95% CI) | Intubation<br>Interact.<br>P-Value | Intubation<br>M vs. F OR<br>(95% CI) | ICU<br>Interact.<br>P-Value | ICU<br>M vs. F OR<br>(95% CI) |
|-------------------------|------|-------------------------------|---------------------------------|------------------------------------|--------------------------------------|-----------------------------|-------------------------------|
| Age group               |      |                               |                                 |                                    |                                      |                             |                               |
| <55                     | 1285 | 0.27                          | 1.35 (0.84-2.19)                | 0.01                               | 1.68 (1.12-2.53)                     | <0.001                      | 2.04 (1.49-2.78)              |
| 55-64                   | 976  | 0.27                          | 0.98 (0.69-1.39)                | 0.01                               | 0.81 (0.57-1.16)                     | <0.001                      | 0.88 (0.65-1.19)              |
| 65-74                   | 1142 | 0.27                          | 1.51 (1.13-2.03)                | 0.01                               | 1.07 (0.78-1.46)                     | <0.001                      | 1.19 (0.9-1.57)               |
| >=75                    | 1527 | 0.27                          | 1.18 (0.95-1.48)                | 0.01                               | 1.56 (1.14-2.14)                     | <0.001                      | 1.59 (1.22-2.08)              |
| Race/Ethnicity          |      |                               |                                 |                                    |                                      |                             |                               |
| Non-Hispanic White      | 1171 | 0.58                          | 1.35 (1-1.81)                   | 0.6                                | 1.31 (0.91-1.87)                     | 0.57                        | 1.57 (1.16-2.12)              |
| Non-Hispanic Black      | 1304 | 0.58                          | 1.29 (0.97-1.7)                 | 0.6                                | 1.38 (0.99-1.92)                     | 0.57                        | 1.43 (1.09-1.88)              |
| Hispanic                | 1393 | 0.58                          | 1.18 (0.89-1.57)                | 0.6                                | 1.15 (0.84-1.56)                     | 0.57                        | 1.31 (1.01-1.69)              |
| Asian                   | 226  | 0.58                          | 0.72 (0.36-1.43)                | 0.6                                | 0.71 (0.34-1.51)                     | 0.57                        | 0.87 (0.45-1.66)              |
| Other race/ethnicity    | 690  | 0.58                          | 1.27 (0.86-1.88)                | 0.6                                | 1.22 (0.79-1.89)                     | 0.57                        | 1.33 (0.92-1.92)              |
| Manhattan facility      |      |                               |                                 |                                    |                                      |                             |                               |
| No                      | 1708 | 0.3                           | 1.36 (1.07-1.71)                | 0.74                               | 1.27 (0.96-1.68)                     | 0.49                        | 1.28 (1.01-1.64)              |
| Yes                     | 3222 | 0.3                           | 1.16 (0.95-1.41)                | 0.74                               | 1.2 (0.96-1.49)                      | 0.49                        | 1.42 (1.19-1.7)               |
| Time period             |      |                               |                                 |                                    |                                      |                             |                               |
| Before April 13         | 3218 | 0.24                          | 1.22 (1.02-1.46)                | 0.81                               | 1.24 (1.01-1.52)                     | 0.41                        | 1.42 (1.19-1.69)              |
| April 13 - June 2       | 1499 | 0.24                          | 1.23 (0.92-1.63)                | 0.81                               | 1.15 (0.82-1.61)                     | 0.41                        | 1.21 (0.92-1.59)              |
| June 2 - August 5       | 213  | 0.24                          | 4.48 (0.88-22.77)               | 0.81                               | 1.63 (0.57-4.65)                     | 0.41                        | 1.83 (0.96-3.49)              |
| Hypertension            |      |                               |                                 |                                    |                                      |                             |                               |
| No                      | 3144 | 0.84                          | 1.22 (1.01-1.48)                | 0.54                               | 1.27 (1.02-1.58)                     | 0.09                        | 1.51 (1.26-1.82)              |
| Yes                     | 1786 | 0.84                          | 1.26 (1-1.59)                   | 0.54                               | 1.14 (0.86-1.51)                     | 0.09                        | 1.17 (0.93-1.48)              |
| Diabetes                |      |                               |                                 |                                    |                                      |                             |                               |
| No                      | 3734 | 0.46                          | 1.28 (1.07-1.53)                | 0.52                               | 1.27 (1.03-1.55)                     | 0.2                         | 1.46 (1.23-1.73)              |
| Yes                     | 1196 | 0.46                          | 1.13 (0.85-1.5)                 | 0.52                               | 1.12 (0.81-1.54)                     | 0.2                         | 1.18 (0.9-1.55)               |
| Coronary artery disease |      |                               |                                 |                                    |                                      |                             |                               |

|  |                        |      |      |                  |      |                  |      |                  |
|--|------------------------|------|------|------------------|------|------------------|------|------------------|
|  | No                     | 4245 | 0.52 | 1.26 (1.07-1.49) | 0.34 | 1.26 (1.05-1.52) | 0.95 | 1.38 (1.18-1.61) |
|  | Yes                    | 685  | 0.52 | 1.11 (0.77-1.6)  | 0.34 | 0.99 (0.62-1.58) | 0.95 | 1.36 (0.94-1.97) |
|  | Heart failure          |      |      |                  |      |                  |      |                  |
|  | No                     | 4546 | 0.78 | 1.24 (1.06-1.46) | 0.51 | 1.24 (1.04-1.49) | 0.14 | 1.42 (1.22-1.65) |
|  | Yes                    | 384  | 0.78 | 1.16 (0.71-1.89) | 0.51 | 1 (0.55-1.84)    | 0.14 | 0.97 (0.61-1.57) |
|  | Atrial fibrillation    |      |      |                  |      |                  |      |                  |
|  | No                     | 4560 | 0.56 | 1.25 (1.07-1.47) | 0.95 | 1.22 (1.02-1.46) | 0.8  | 1.38 (1.19-1.61) |
|  | Yes                    | 370  | 0.56 | 1.08 (0.67-1.75) | 0.95 | 1.24 (0.69-2.24) | 0.8  | 1.29 (0.79-2.11) |
|  | Chronic kidney disease |      |      |                  |      |                  |      |                  |
|  | No                     | 4331 | 0.56 | 1.26 (1.07-1.48) | 0.62 | 1.21 (1-1.45)    | 0.41 | 1.34 (1.15-1.57) |
|  | Yes                    | 599  | 0.56 | 1.11 (0.74-1.65) | 0.62 | 1.38 (0.82-2.31) | 0.41 | 1.61 (1.07-2.44) |
|  | COPD/asthma            |      |      |                  |      |                  |      |                  |
|  | No                     | 4494 | 0.79 | 1.23 (1.05-1.44) | 0.8  | 1.23 (1.03-1.48) | 0.86 | 1.37 (1.17-1.59) |
|  | Yes                    | 436  | 0.79 | 1.32 (0.82-2.12) | 0.8  | 1.14 (0.64-2.03) | 0.86 | 1.43 (0.89-2.29) |
|  | Obesity                |      |      |                  |      |                  |      |                  |
|  | No                     | 3314 | 0.1  | 1.35 (1.12-1.63) | 0.03 | 1.43 (1.14-1.79) | 0.03 | 1.56 (1.29-1.88) |
|  | Yes                    | 1616 | 0.1  | 1.04 (0.8-1.34)  | 0.03 | 0.98 (0.75-1.28) | 0.03 | 1.14 (0.9-1.43)  |
|  | Cancer                 |      |      |                  |      |                  |      |                  |
|  | No                     | 4563 | 0.21 | 1.27 (1.09-1.49) | 0.7  | 1.21 (1.01-1.45) | 0.13 | 1.42 (1.22-1.65) |
|  | Yes                    | 367  | 0.21 | 0.9 (0.53-1.51)  | 0.7  | 1.38 (0.71-2.69) | 0.13 | 0.93 (0.56-1.57) |
|  | Chronic liver disease  |      |      |                  |      |                  |      |                  |
|  | No                     | 4766 | 0.15 | 1.26 (1.08-1.47) | 0.02 | 1.27 (1.06-1.52) | 0.51 | 1.39 (1.2-1.61)  |
|  | Yes                    | 164  | 0.15 | 0.67 (0.29-1.54) | 0.02 | 0.46 (0.19-1.07) | 0.51 | 1.07 (0.5-2.28)  |
|  | Oxygen sat.            |      |      |                  |      |                  |      |                  |
|  | >=92%                  | 3813 | 0.02 | 1.39 (1.16-1.66) | 0.42 | 1.29 (1.04-1.59) | 0.08 | 1.49 (1.25-1.77) |
|  | <92%                   | 1110 | 0.02 | 0.95 (0.72-1.24) | 0.42 | 1.11 (0.84-1.48) | 0.08 | 1.13 (0.87-1.47) |



Supplemental Table 6: Sex-stratified multivariable logistic regression models for death, intubation, and ICU admission.

| Variable                | Death, Male<br>Adj. OR (95% CI) | Death, Female<br>Adj. OR (95% CI) | Intubation, Male<br>Adj. OR (95% CI) | Intubation,<br>Female<br>Adj. OR (95% CI) | ICU, Male<br>Adj. OR (95% CI) | ICU, Female<br>Adj. OR (95% CI) |
|-------------------------|---------------------------------|-----------------------------------|--------------------------------------|-------------------------------------------|-------------------------------|---------------------------------|
| Age <55                 | 0.42 (0.3-0.59)                 | 0.3 (0.18-0.49)                   | 0.79 (0.58-1.08)                     | 0.37 (0.24-0.58)                          | 1 (0.78-1.3)                  | 0.45 (0.31-0.65)                |
| Age 55-64               | Ref                             | Ref                               | Ref                                  | Ref                                       | Ref                           | Ref                             |
| Age 65-74               | 1.72 (1.3-2.27)                 | 1.12 (0.77-1.61)                  | 1.24 (0.92-1.69)                     | 0.96 (0.66-1.39)                          | 1.21 (0.94-1.57)              | 0.9 (0.65-1.24)                 |
| Age >=75                | 3.42 (2.59-4.49)                | 3.25 (2.3-4.56)                   | 0.95 (0.69-1.31)                     | 0.54 (0.37-0.79)                          | 0.87 (0.67-1.14)              | 0.5 (0.36-0.7)                  |
| Non-Hispanic White      | Ref                             | Ref                               | Ref                                  | Ref                                       | Ref                           | Ref                             |
| Non-Hispanic Black      | 0.98 (0.75-1.29)                | 1.02 (0.74-1.41)                  | 1.06 (0.77-1.45)                     | 0.9 (0.61-1.33)                           | 1.02 (0.78-1.33)              | 1 (0.72-1.39)                   |
| Hispanic                | 0.89 (0.68-1.17)                | 0.97 (0.7-1.34)                   | 1.11 (0.82-1.51)                     | 1.18 (0.8-1.73)                           | 1.07 (0.83-1.37)              | 1.24 (0.9-1.71)                 |
| Asian                   | 0.81 (0.5-1.31)                 | 1.55 (0.86-2.77)                  | 0.94 (0.54-1.61)                     | 1.8 (0.94-3.46)                           | 0.9 (0.57-1.41)               | 1.6 (0.9-2.84)                  |
| Other race/ethnicity    | 1.21 (0.89-1.64)                | 1.28 (0.86-1.9)                   | 1.32 (0.94-1.85)                     | 1.36 (0.85-2.16)                          | 1.23 (0.93-1.64)              | 1.44 (0.96-2.13)                |
| Manhattan facility      | 0.61 (0.5-0.74)                 | 0.7 (0.55-0.89)                   | 0.8 (0.64-1)                         | 0.84 (0.63-1.12)                          | 1.04 (0.86-1.25)              | 0.94 (0.73-1.2)                 |
| Before April 13         | Ref                             | Ref                               | Ref                                  | Ref                                       | Ref                           | Ref                             |
| April 13 - June 2       | 0.54 (0.43-0.68)                | 0.52 (0.4-0.66)                   | 0.67 (0.52-0.86)                     | 0.72 (0.54-0.98)                          | 0.66 (0.53-0.81)              | 0.8 (0.63-1.03)                 |
| June 2 - August 5       | 0.26 (0.12-0.58)                | 0.07 (0.02-0.31)                  | 0.69 (0.36-1.31)                     | 0.57 (0.24-1.34)                          | 1.47 (0.96-2.24)              | 1.35 (0.79-2.31)                |
| Obesity                 | 1.2 (0.96-1.5)                  | 1.66 (1.29-2.13)                  | 1.28 (1.02-1.63)                     | 1.92 (1.45-2.54)                          | 1.32 (1.08-1.6)               | 1.87 (1.48-2.37)                |
| Hypertension            | 0.89 (0.71-1.13)                | 0.71 (0.54-0.93)                  | 0.87 (0.66-1.14)                     | 0.86 (0.63-1.18)                          | 0.79 (0.63-0.99)              | 0.96 (0.73-1.25)                |
| Diabetes                | 1.13 (0.89-1.44)                | 1.29 (0.96-1.71)                  | 1.3 (0.99-1.71)                      | 1.34 (0.96-1.88)                          | 1.26 (1-1.59)                 | 1.39 (1.05-1.84)                |
| Coronary artery disease | 1.07 (0.8-1.43)                 | 1.29 (0.92-1.81)                  | 0.76 (0.53-1.09)                     | 1 (0.64-1.55)                             | 1.2 (0.91-1.59)               | 1.01 (0.7-1.45)                 |
| Heart failure           | 0.99 (0.68-1.44)                | 0.93 (0.6-1.46)                   | 0.89 (0.56-1.41)                     | 1.04 (0.6-1.81)                           | 0.93 (0.65-1.34)              | 1.51 (0.97-2.36)                |
| Atrial fibrillation     | 1.16 (0.82-1.65)                | 1.34 (0.88-2.04)                  | 1.48 (0.98-2.22)                     | 1.38 (0.81-2.36)                          | 1.51 (1.07-2.12)              | 1.43 (0.91-2.23)                |
| Chronic kidney disease  | 1.28 (0.95-1.73)                | 1.48 (1.02-2.14)                  | 0.98 (0.68-1.4)                      | 0.74 (0.46-1.2)                           | 1.09 (0.81-1.45)              | 0.72 (0.49-1.08)                |
| COPD/asthma             | 0.98 (0.68-1.41)                | 0.83 (0.57-1.21)                  | 0.87 (0.56-1.36)                     | 0.83 (0.53-1.29)                          | 0.97 (0.68-1.38)              | 0.78 (0.54-1.13)                |
| Cancer                  | 0.97 (0.69-1.38)                | 1.4 (0.91-2.16)                   | 1.01 (0.66-1.54)                     | 0.82 (0.47-1.45)                          | 0.85 (0.6-1.21)               | 1.28 (0.84-1.96)                |
| Chronic liver disease   | 1 (0.59-1.7)                    | 1.97 (0.98-3.95)                  | 0.84 (0.47-1.51)                     | 2.26 (1.15-4.44)                          | 1.04 (0.66-1.64)              | 1.21 (0.64-2.31)                |
| Oxygen sat. <92%        | 2.44 (1.98-3.01)                | 3.67 (2.85-4.73)                  | 2.6 (2.08-3.25)                      | 2.97 (2.23-3.94)                          | 2.19 (1.8-2.67)               | 2.77 (2.15-3.57)                |

*Supplemental Table 7: Clinical characteristics and outcomes of validation cohort (January 2021) compared to primary cohort (August 2020)*

|                                | August 2020<br>(N=4930) | January 2021<br>(N=1645) | P-value |
|--------------------------------|-------------------------|--------------------------|---------|
| Age (yrs)                      | 66 (54 - 78)            | 66 (52 - 78)             | 0.3     |
| Age <55                        | 1281 (26%)              | 466 (28.3%)              | 0.07    |
| Age 55-64                      | 975 (19.8%)             | 303 (18.4%)              | 0.2     |
| Age 65-74                      | 1142 (23.2%)            | 370 (22.5%)              | 0.6     |
| Age >=75                       | 1523 (30.9%)            | 506 (30.8%)              | 0.9     |
| Male                           | 2753 (55.9%)            | 921 (56%)                | 1       |
| Asian                          | 229 (4.8%)              | 85 (5.5%)                | 0.3     |
| Hispanic                       | 1404 (29.4%)            | 356 (22.8%)              | <0.001  |
| Non-Hispanic Black             | 1314 (27.5%)            | 248 (15.9%)              | <0.001  |
| Non-Hispanic White             | 1171 (24.5%)            | 615 (39.4%)              | <0.001  |
| Other race/ethnicity           | 661 (13.8%)             | 255 (16.4%)              | 0.01    |
| Manhattan treatment facility   | 3217 (65.4%)            | 1223 (74.3%)             | <0.001  |
| Current/former smoker          | 1320 (33.2%)            | 440 (30.7%)              | 0.09    |
| Body mass index (kg/m2)        | 27.5 (23.91 - 32.32)    | 27.81 (24 - 32.24)       | 0.7     |
| Hypertension                   | 1815 (36.9%)            | 496 (30.2%)              | <0.001  |
| Diabetes                       | 1211 (24.6%)            | 322 (19.6%)              | <0.001  |
| Coronary artery disease        | 703 (14.3%)             | 207 (12.6%)              | 0.09    |
| Heart failure                  | 410 (8.3%)              | 111 (6.7%)               | 0.04    |
| Atrial fibrillation            | 378 (7.7%)              | 104 (6.3%)               | 0.07    |
| Chronic kidney disease         | 618 (12.6%)             | 146 (8.9%)               | <0.001  |
| COPD/asthma                    | 440 (8.9%)              | 133 (8.1%)               | 0.3     |
| Obesity                        | 1620 (32.9%)            | 595 (36.2%)              | 0.02    |
| Cancer                         | 378 (7.7%)              | 136 (8.3%)               | 0.5     |
| Chronic liver disease          | 167 (3.4%)              | 51 (3.1%)                | 0.6     |
| HIV                            | 86 (1.7%)               | 20 (1.2%)                | 0.2     |
| Temperature (°F)               | 98.6 (98 - 99.9)        | 98.6 (97.9 - 99.7)       | <0.001  |
| Fever                          | 976 (19.8%)             | 290 (17.6%)              | 0.05    |
| Heart rate (bpm)               | 96 (83 - 110)           | 91 (79 - 105)            | <0.001  |
| Tachycardia                    | 1971 (40.1%)            | 523 (31.8%)              | <0.001  |
| Systolic blood pressure (mmHg) | 129 (115 - 145)         | 131 (116 - 145)          | 0.03    |
| Hypotension                    | 176 (3.6%)              | 40 (2.4%)                | 0.03    |
| Respiratory rate (bpm)         | 20 (18 - 22)            | 20 (18 - 20)             | <0.001  |
| Tachypnea                      | 722 (14.7%)             | 153 (9.3%)               | <0.001  |
| Oxygen saturation (%)          | 95 (92 - 98)            | 96 (94 - 98)             | <0.001  |
| Oxygen sat. <92%               | 1110 (22.6%)            | 222 (13.5%)              | <0.001  |
| Treated with remdesivir        | 139 (2.8%)              | 576 (35%)                | <0.001  |
| Treated with steroids          | 1341 (27.3%)            | 1190 (72.3%)             | <0.001  |
| Treated with dexamethasone     | 163 (3.3%)              | 1082 (65.8%)             | <0.001  |
| Invasive ventilation           | 737 (15%)               | 154 (9.4%)               | <0.001  |
| Intensive care                 | 1151 (23.4%)            | 312 (19%)                | <0.001  |

---

|                   |              |             |        |
|-------------------|--------------|-------------|--------|
| In-hospital death | 1186 (24.1%) | 150 (10.2%) | <0.001 |
|-------------------|--------------|-------------|--------|

---

Supplemental Table 8: Multivariable logistic regression for in-hospital mortality, ICU-level care, and intubation using the January 2021 validation cohort.

|                         | In-hospital Mortality |         | ICU-level care     |         | Intubation         |         |
|-------------------------|-----------------------|---------|--------------------|---------|--------------------|---------|
|                         | Adj. OR (95% CI)      | P-value | Adj. OR (95% CI)   | P-value | Adj. OR (95% CI)   | P-value |
| Age <55                 | 0.552 (0.214-1.43)    | 0.219   | 0.667 (0.425-1.05) | 0.079   | 0.85 (0.43-1.68)   | 0.64    |
| Age 55-64               | Ref                   | -       | Ref                | -       | Ref                | -       |
| Age 65-74               | 3.19 (1.55-6.6)       | 0.002   | 1.902 (1.26-2.88)  | 0.002   | 3.034 (1.67-5.49)  | <0.001  |
| Age >=75                | 8.499 (4.25-16.9)     | <0.001  | 1.87 (1.23-2.83)   | 0.003   | 2.829 (1.55-5.15)  | <0.001  |
| Male                    | 1.559 (1.05-2.32)     | 0.029   | 1.652 (1.24-2.2)   | <0.001  | 1.719 (1.17-2.53)  | 0.006   |
| Non-Hispanic White      | Ref                   | -       | Ref                | -       | Ref                | -       |
| Non-Hispanic Black      | 0.607 (0.309-1.19)    | 0.146   | 0.703 (0.453-1.09) | 0.115   | 0.61 (0.321-1.16)  | 0.133   |
| Hispanic                | 1.057 (0.633-1.77)    | 0.832   | 0.803 (0.555-1.16) | 0.245   | 0.925 (0.568-1.51) | 0.753   |
| Asian                   | 0.927 (0.352-2.44)    | 0.878   | 1.068 (0.586-1.95) | 0.831   | 1.203 (0.56-2.58)  | 0.635   |
| Other race/ethnicity    | 1.996 (1.2-3.32)      | 0.008   | 1.068 (0.73-1.56)  | 0.734   | 1.33 (0.817-2.16)  | 0.252   |
| Manhattan facility      | 0.681 (0.456-1.02)    | 0.06    | 1.203 (0.881-1.64) | 0.245   | 0.895 (0.603-1.33) | 0.582   |
| Obesity                 | 1.228 (0.812-1.86)    | 0.331   | 1.197 (0.896-1.6)  | 0.224   | 1.405 (0.957-2.06) | 0.082   |
| Hypertension            | 0.842 (0.529-1.34)    | 0.467   | 0.707 (0.494-1.01) | 0.057   | 0.768 (0.484-1.22) | 0.262   |
| Diabetes                | 1.571 (0.963-2.56)    | 0.07    | 1.322 (0.901-1.94) | 0.153   | 1.344 (0.819-2.21) | 0.241   |
| Coronary artery disease | 1.145 (0.683-1.92)    | 0.608   | 0.78 (0.504-1.21)  | 0.266   | 0.727 (0.409-1.29) | 0.277   |
| Heart failure           | 1.32 (0.673-2.59)     | 0.42    | 1.089 (0.622-1.91) | 0.765   | 0.938 (0.443-1.99) | 0.868   |
| Atrial fibrillation     | 1.443 (0.783-2.66)    | 0.24    | 1 (0.579-1.73)     | 1       | 1.054 (0.531-2.09) | 0.88    |
| Chronic kidney disease  | 2.038 (1.13-3.67)     | 0.018   | 1.589 (0.974-2.59) | 0.064   | 1.567 (0.84-2.92)  | 0.158   |
| COPD/asthma             | 0.726 (0.368-1.43)    | 0.355   | 0.77 (0.452-1.31)  | 0.335   | 0.819 (0.411-1.63) | 0.569   |
| Cancer                  | 0.885 (0.446-1.75)    | 0.726   | 0.714 (0.422-1.21) | 0.209   | 0.936 (0.481-1.82) | 0.844   |
| Chronic liver disease   | 1.478 (0.52-4.2)      | 0.463   | 1.202 (0.573-2.52) | 0.627   | 1.302 (0.498-3.41) | 0.59    |
| Oxygen sat. <92%        | 3.896 (2.49-6.1)      | <0.001  | 3.819 (2.77-5.31)  | <0.001  | 4.055 (2.75-6.03)  | <0.001  |

Supplemental Table 9: Sex-stratified multivariable logistic regression for in-hospital mortality, ICU-level care, and intubation using the January 2021 validation cohort.

|                         | In-hospital Mortality    |                            | ICU-level care           |                            | Intubation               |                            |
|-------------------------|--------------------------|----------------------------|--------------------------|----------------------------|--------------------------|----------------------------|
|                         | Male<br>Adj. OR (95% CI) | Female<br>Adj. OR (95% CI) | Male<br>Adj. OR (95% CI) | Female<br>Adj. OR (95% CI) | Male<br>Adj. OR (95% CI) | Female<br>Adj. OR (95% CI) |
| Age <55                 | 0.536 (0.187-1.53)       | 0.525 (0.0447-6.15)        | 0.674 (0.397-1.15)       | 0.546 (0.215-1.39)         | 0.789 (0.361-1.72)       | 0.928 (0.215-4)            |
| Age 55-64               | Ref                      | Ref                        | Ref                      | Ref                        | Ref                      | Ref                        |
| Age 65-74               | 2.625 (1.12-6.18)        | 7.029 (1.45-33.9)          | 1.575 (0.944-2.63)       | 2.746 (1.31-5.81)          | 2.512 (1.23-5.12)        | 4.855 (1.52-15.5)          |
| Age >=75                | 7.925 (3.52-18)          | 14.013 (3.11-63.6)         | 1.837 (1.09-3.1)         | 1.933 (0.935-4)            | 2.945 (1.44-6.1)         | 2.915 (0.911-9.25)         |
| Non-Hispanic White      | Ref                      | Ref                        | Ref                      | Ref                        | Ref                      | Ref                        |
| Non-Hispanic Black      | 0.611 (0.242-1.55)       | 0.562 (0.202-1.56)         | 0.658 (0.361-1.2)        | 0.773 (0.399-1.5)          | 0.589 (0.246-1.41)       | 0.651 (0.242-1.75)         |
| Hispanic                | 0.97 (0.485-1.94)        | 1.106 (0.498-2.46)         | 0.862 (0.539-1.38)       | 0.68 (0.367-1.26)          | 0.969 (0.525-1.79)       | 0.82 (0.357-1.88)          |
| Asian                   | 1.041 (0.337-3.21)       | 0.713 (0.0807-6.3)         | 1.27 (0.634-2.55)        | 0.708 (0.188-2.67)         | 1.266 (0.525-3.06)       | 1.239 (0.246-6.24)         |
| Other race/ethnicity    | 1.921 (1.01-3.67)        | 1.904 (0.8-4.53)           | 1.081 (0.674-1.73)       | 0.921 (0.468-1.81)         | 1.218 (0.668-2.22)       | 1.388 (0.578-3.34)         |
| Manhattan facility      | 0.727 (0.426-1.24)       | 0.563 (0.29-1.09)          | 1.121 (0.758-1.66)       | 1.365 (0.792-2.35)         | 0.82 (0.503-1.34)        | 1.057 (0.511-2.19)         |
| Obesity                 | 1.822 (1.04-3.19)        | 0.742 (0.388-1.42)         | 1.332 (0.914-1.94)       | 0.928 (0.578-1.49)         | 1.565 (0.955-2.56)       | 1.083 (0.573-2.05)         |
| Hypertension            | 0.829 (0.45-1.53)        | 0.859 (0.4-1.84)           | 0.492 (0.306-0.792)      | 1.137 (0.634-2.04)         | 0.567 (0.309-1.04)       | 1.241 (0.572-2.69)         |
| Diabetes                | 1.745 (0.912-3.34)       | 1.51 (0.679-3.36)          | 1.539 (0.944-2.51)       | 1.078 (0.571-2.03)         | 1.669 (0.897-3.11)       | 0.918 (0.402-2.1)          |
| Coronary artery disease | 1.564 (0.825-2.96)       | 0.538 (0.205-1.42)         | 0.961 (0.562-1.64)       | 0.494 (0.222-1.1)          | 0.711 (0.346-1.46)       | 0.74 (0.275-1.99)          |
| Heart failure           | 0.731 (0.273-1.96)       | 2.974 (1.1-8.07)           | 0.76 (0.348-1.66)        | 1.65 (0.695-3.92)          | 0.831 (0.3-2.3)          | 1.064 (0.326-3.47)         |
| Atrial fibrillation     | 1.669 (0.716-3.89)       | 1.359 (0.517-3.57)         | 0.963 (0.47-1.97)        | 1.012 (0.408-2.51)         | 1.115 (0.471-2.64)       | 0.964 (0.282-3.3)          |
| Chronic kidney disease  | 2.307 (1.03-5.16)        | 2.243 (0.896-5.62)         | 1.6 (0.829-3.09)         | 1.902 (0.897-4.04)         | 1.196 (0.501-2.86)       | 2.716 (1.08-6.83)          |
| COPD/asthma             | 0.574 (0.217-1.52)       | 1.012 (0.365-2.8)          | 0.672 (0.311-1.45)       | 0.78 (0.36-1.69)           | 0.587 (0.208-1.66)       | 1.036 (0.39-2.76)          |
| Cancer                  | 1.29 (0.562-2.97)        | 0.369 (0.0948-1.44)        | 0.631 (0.312-1.28)       | 0.742 (0.329-1.67)         | 1.127 (0.495-2.57)       | 0.643 (0.201-2.05)         |
| Chronic liver disease   | 1.459 (0.348-6.11)       | 1.954 (0.395-9.67)         | 0.967 (0.339-2.76)       | 1.978 (0.659-5.93)         | 0.747 (0.157-3.55)       | 2.214 (0.582-8.44)         |
| Oxygen sat. <92%        | 4.179 (2.34-7.51)        | 3.706 (1.77-7.75)          | 3.525 (2.35-5.33)        | 4.179 (2.4-7.32)           | 4.015 (2.49-6.52)        | 3.935 (1.95-8.01)          |

Supplemental Figure 1: Box plots depicting SARS-CoV-2 viral loads by sex in the Pujadas et al. cohort. The median is represented by the dark line while the lower and upper bounds of the box represent the 25<sup>th</sup> and 75<sup>th</sup> percentiles, respectively. The whiskers reflect the maximum and minimum values of the data.

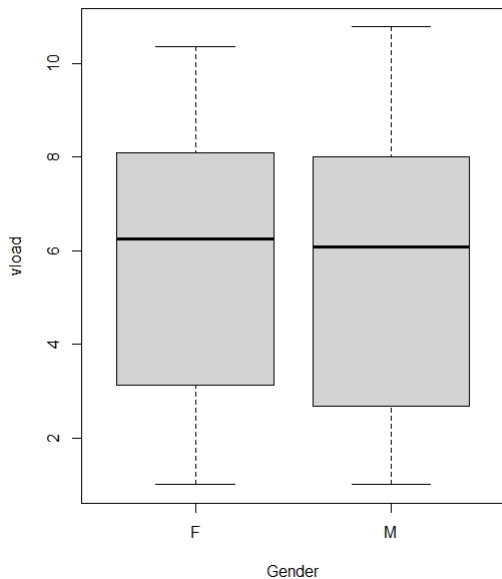

Supplemental Figure 2: Table and forest plot of multivariable logistic regression models predicting mortality, intubation, or ICU care. Odds ratios are adjusted for all variables listed.

| Variable                | Death            | Intubation       | ICU              |
|-------------------------|------------------|------------------|------------------|
|                         | OR (95% CI)      | OR (95% CI)      | OR (95% CI)      |
| Age <55                 | 0.37 (0.28–0.49) | 0.61 (0.47–0.79) | 0.76 (0.61–0.93) |
| Age 55–64               | Ref              | Ref              | Ref              |
| Age 65–74               | 1.47 (1.18–1.84) | 1.15 (0.91–1.45) | 1.09 (0.89–1.34) |
| Age ≥75                 | 3.35 (2.71–4.15) | 0.76 (0.6–0.97)  | 0.71 (0.58–0.87) |
| Male                    | 1.24 (1.06–1.44) | 1.22 (1.03–1.46) | 1.37 (1.19–1.59) |
| Non-Hispanic White      | Ref              | Ref              | Ref              |
| Non-Hispanic Black      | 1.02 (0.83–1.25) | 1.02 (0.8–1.31)  | 1.04 (0.85–1.28) |
| Hispanic                | 0.95 (0.78–1.17) | 1.18 (0.93–1.49) | 1.16 (0.96–1.41) |
| Asian                   | 1.04 (0.72–1.5)  | 1.19 (0.78–1.8)  | 1.09 (0.77–1.56) |
| Other race/ethnicity    | 1.25 (0.99–1.59) | 1.35 (1.03–1.77) | 1.32 (1.05–1.66) |
| Manhattan facility      | 0.65 (0.56–0.75) | 0.81 (0.69–0.97) | 0.99 (0.86–1.15) |
| Before April 13         | Ref              | Ref              | Ref              |
| April 13 – June 2       | 0.54 (0.45–0.63) | 0.69 (0.57–0.84) | 0.72 (0.61–0.84) |
| June 2 – August 5       | 0.17 (0.09–0.34) | 0.62 (0.37–1.04) | 1.42 (1.02–1.97) |
| Obesity                 | 1.38 (1.17–1.62) | 1.51 (1.26–1.81) | 1.53 (1.32–1.78) |
| Hypertension            | 0.81 (0.68–0.97) | 0.87 (0.71–1.07) | 0.86 (0.72–1.02) |
| Diabetes                | 1.2 (0.99–1.44)  | 1.3 (1.06–1.61)  | 1.3 (1.09–1.55)  |
| Coronary artery disease | 1.16 (0.93–1.45) | 0.85 (0.64–1.12) | 1.11 (0.89–1.38) |
| Heart failure           | 0.97 (0.73–1.29) | 0.96 (0.68–1.37) | 1.15 (0.87–1.52) |
| Atrial fibrillation     | 1.22 (0.93–1.59) | 1.42 (1.03–1.96) | 1.46 (1.11–1.91) |
| Chronic kidney disease  | 1.36 (1.08–1.72) | 0.89 (0.67–1.19) | 0.94 (0.75–1.19) |
| COPD/asthma             | 0.91 (0.7–1.17)  | 0.88 (0.65–1.2)  | 0.9 (0.7–1.17)   |
| Cancer                  | 1.12 (0.86–1.47) | 0.93 (0.66–1.29) | 1 (0.76–1.31)    |
| Chronic liver disease   | 1.22 (0.8–1.87)  | 1.21 (0.78–1.87) | 1.05 (0.72–1.52) |
| Oxygen sat. <92%        | 2.86 (2.43–3.35) | 2.71 (2.28–3.23) | 2.41 (2.06–2.81) |

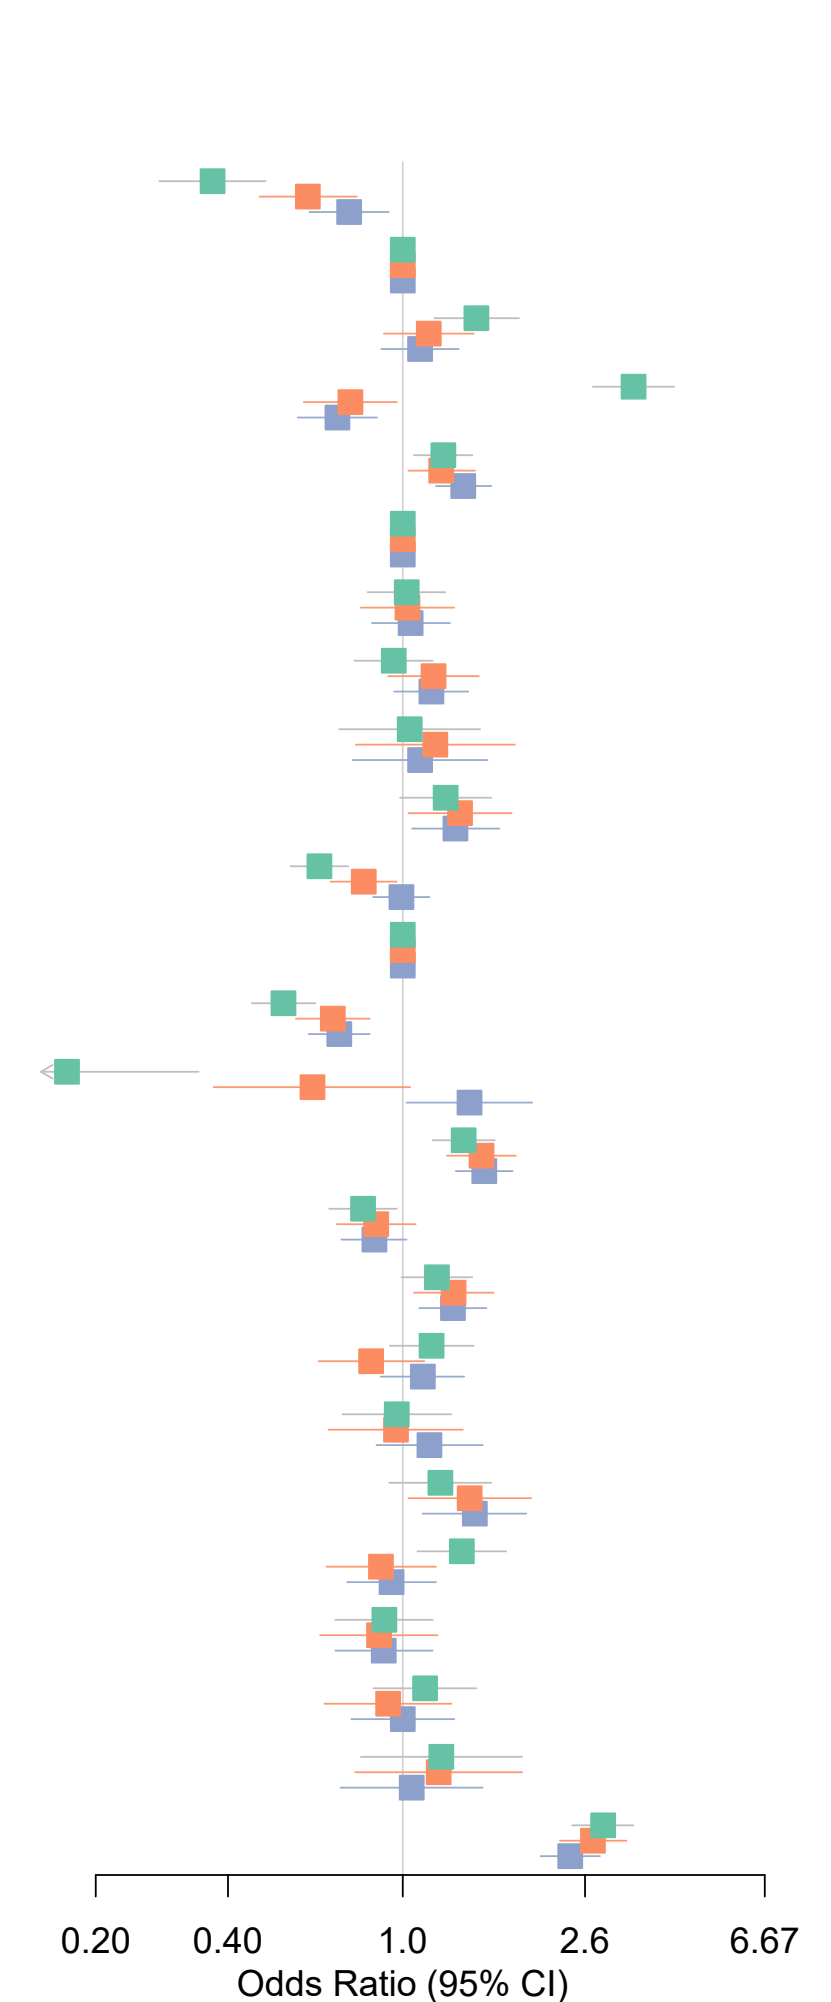

Supplemental Figure 3: Subgroup analysis for male sex as a predictor of mortality in the January 2021 validation cohort. Each subgroup is analyzed using an interaction model between sex and the subgroup variable, adjusting for the other variables listed. The odds ratio for male sex within each strata is presented in the table and forest plot. The interaction p-value for sex and each subgroup variable is shown in the table.

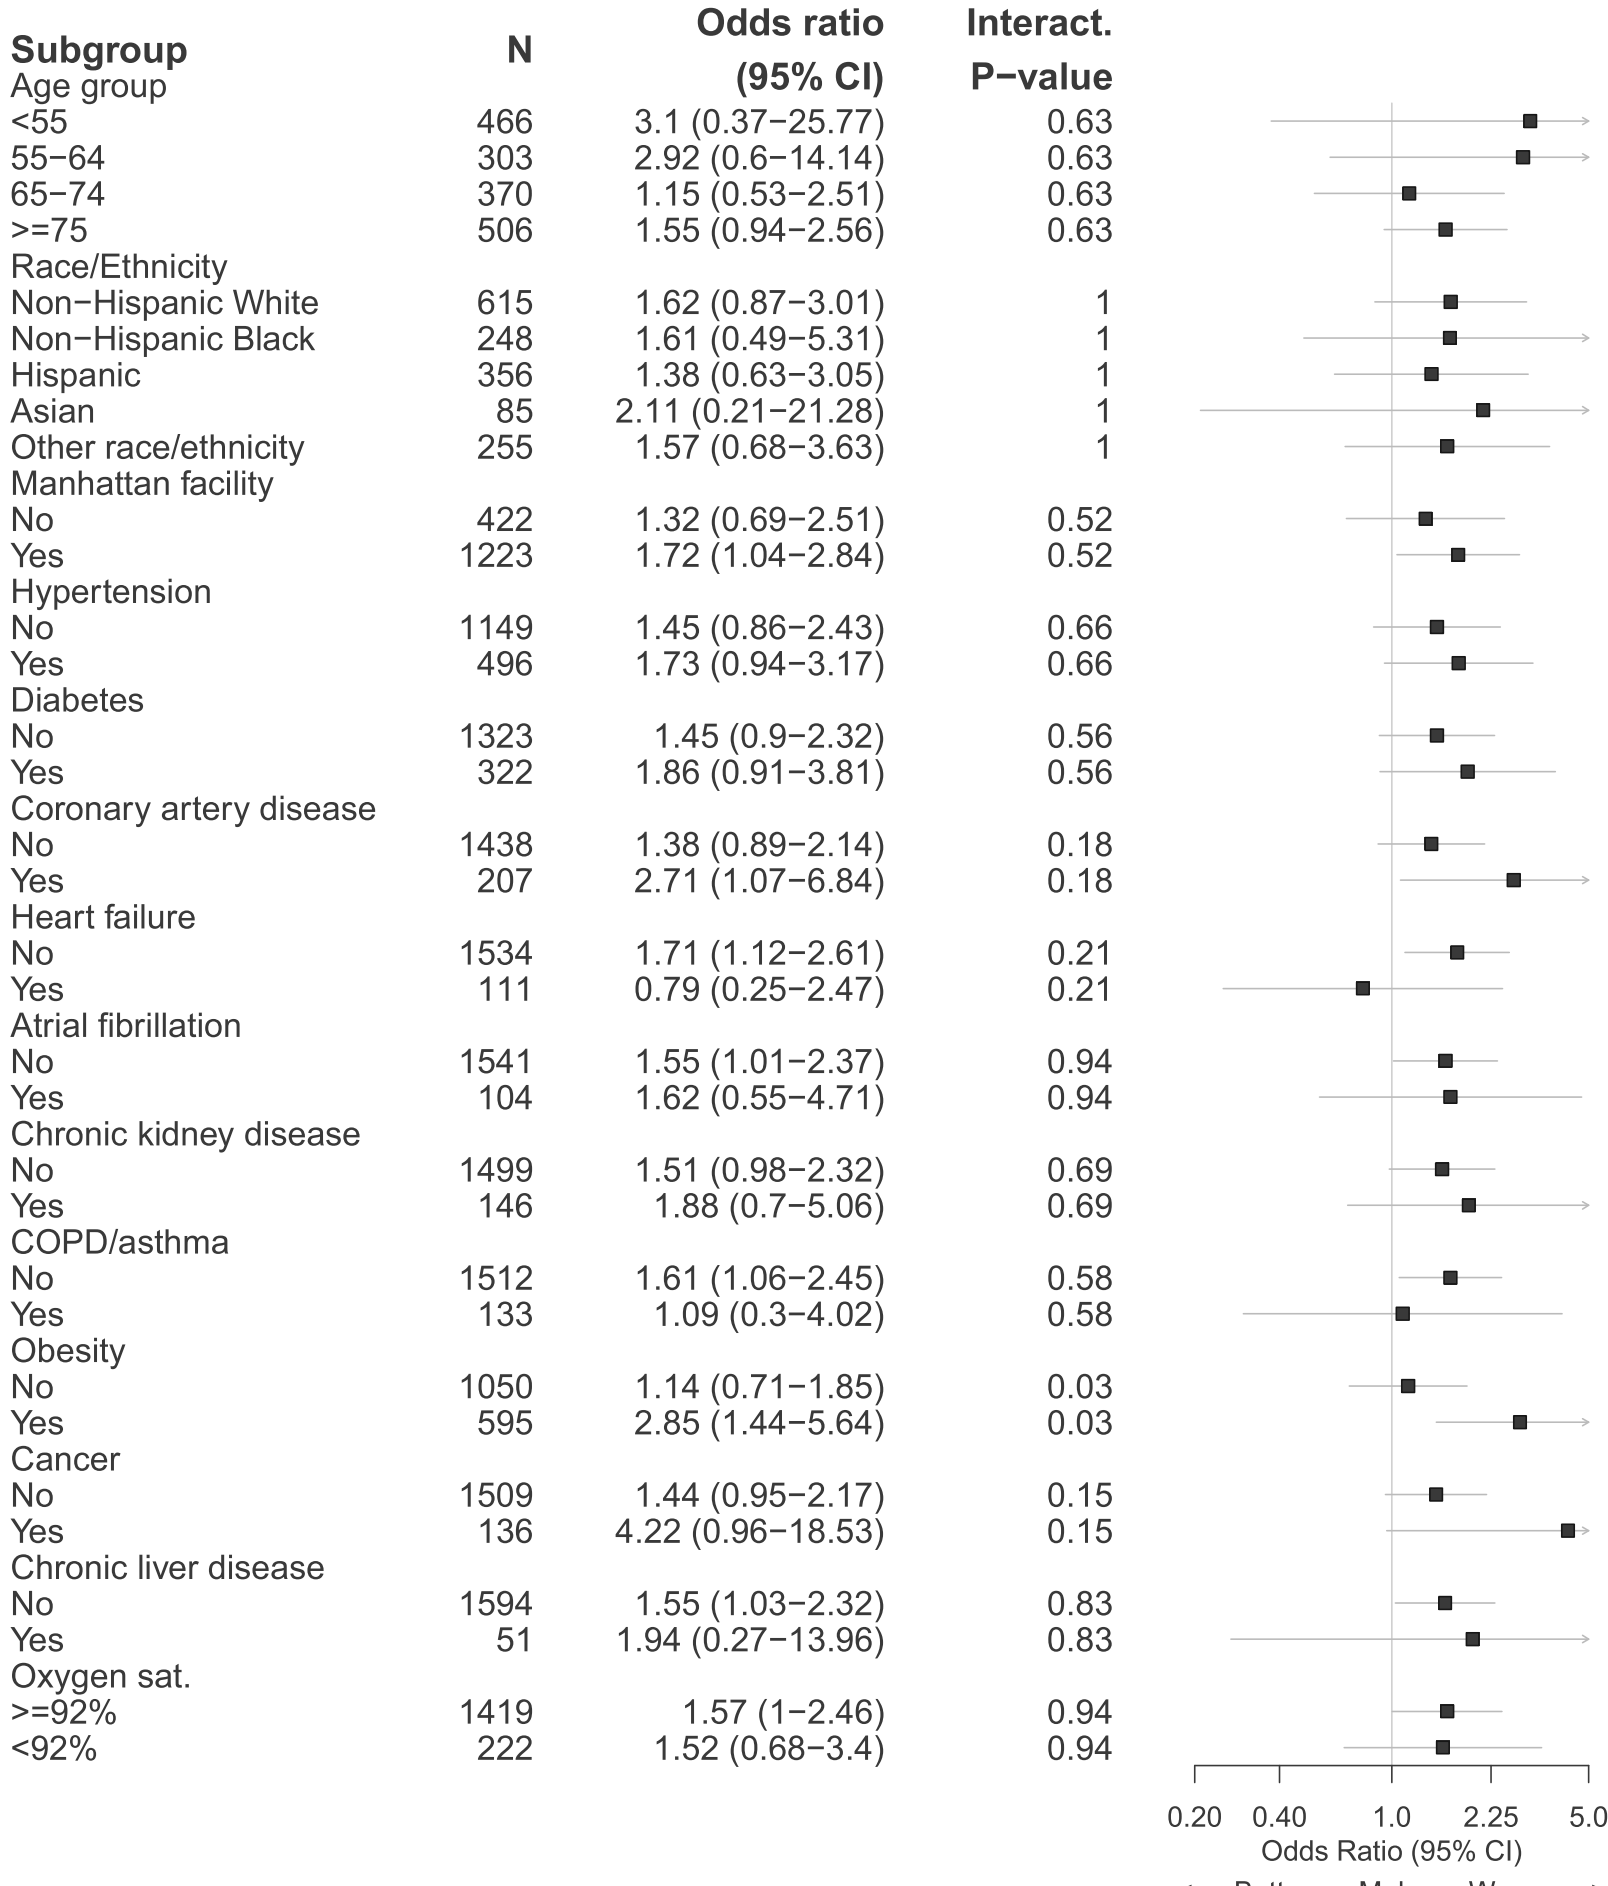

Supplement: 43856_2021_6_MOESM1_ESM.pdf [file 43856_2021_6_MOESM1_ESM.pdf]
