# Supplementary material for: Analysis of sex-specific risk factors and clinical outcomes in COVID-19
Source: PubMed Central journal article supplement (PMC9053255; doi:10.1038/s43856-021-00006-2), 2021-06-30
Supplement: 43856_2021_6_MOESM2_ESM.pdf [file 43856_2021_6_MOESM2_ESM.pdf]

## **Description of Additional Supplementary Files**

**File Name:** Supplementary Data 1

**Description:** Data underlying Figure 1

**File Name:** Supplementary Data 2

**Description:** Data underlying Figure 2
